# Supplementary material
Source: Research Square preprint supplement (doi:10.21203/rs.3.rs-9173017/v1)
Supplement: Supplementary file 1 [file e5d966c422bd4f123b6b5e8f.docx]

**Supplementary information**

**Table S1.** GenBank ID (accession numbers) of the analyzed nucleotide and amino acid sequences.

| Organism (species, strain) | Nucleotide sequence | Amino acid sequence |
| --- | --- | --- |
| *Agrobacterium rhizogenes A4, 15834, NCPPB1855* | NZ_CP073113.1, NZ_CP044124.1, NZ_JAAMEO010000030.1 | WP_142692216.1 |
| *Agrobacterium rhizogenes 1724* | KY000038.1 | ASK42899.1 |
| *Agrobacterium rhizogenes K599 (pRi2659)* | EF433766.1 | ABS11825.1 |
| *Nicotiana tabacum* | X91881.1 | CAA62988.1 |
| *Nicotiana glauca* | X03432.1 | CAA27160.1 |
| *Nicotiana tomentosiformis 1* | KJ599826.1 | AIM40174.1 |
| *Nicotiana tomentosiformis 2* | KJ599826.1 | AIM40177.1 |
| *Linaria creticola 1* | MF997051.1 | AXO59181.1 |
| *Linaria creticola 2* | MF997052.1 | AXO59182.1 |
| *Linaria genistifolia* | KC309424.1 | AGH15831.1 |
| *Linaria vulgaris 1* | EU735069.2 | AFA43818.1 |
| *Linaria vulgaris 2* | EU735069.2 | ACD81987.1 |
| *Agrobacterium vitis 6b* | X77327.1 | CAA54541.1 |


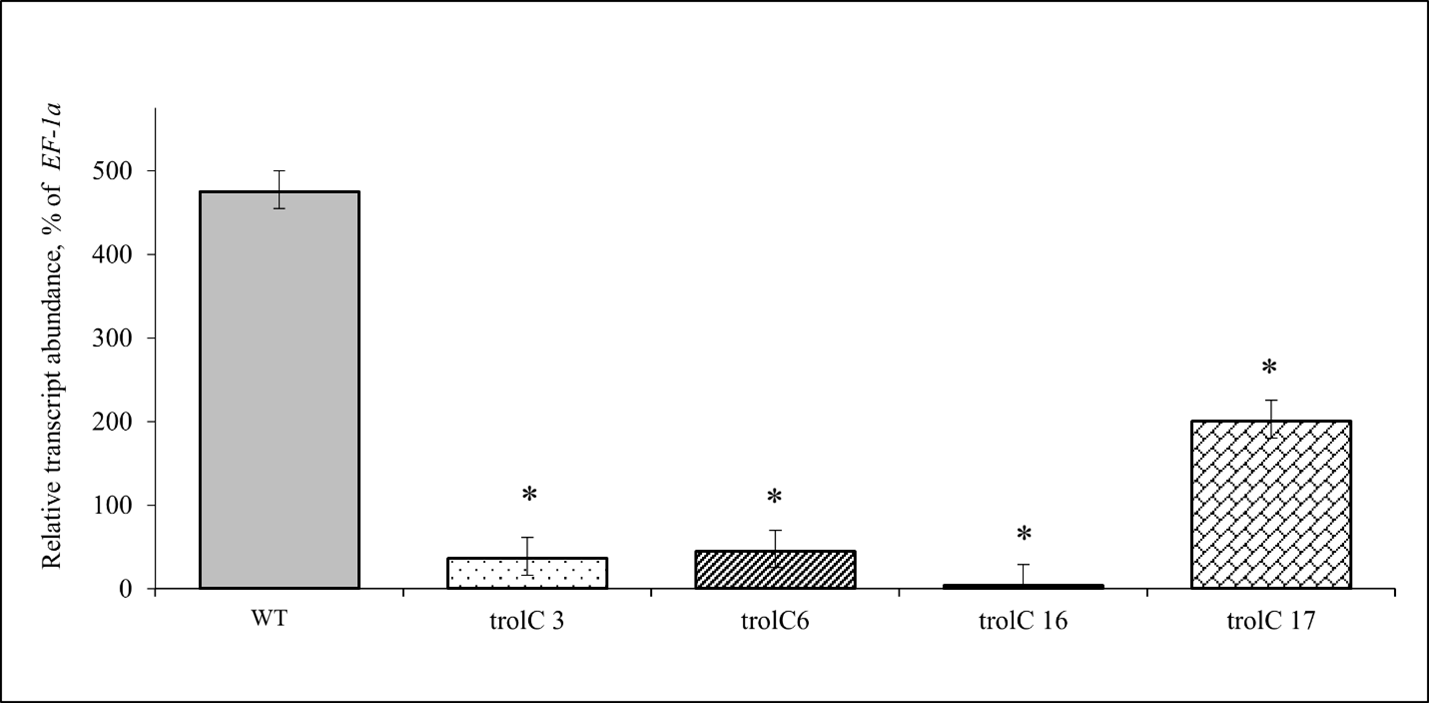


**Fig. S1.** Relative transcript abundance of the *trolC* gene in roots under normal conditions. n=3, * – p˂0.01


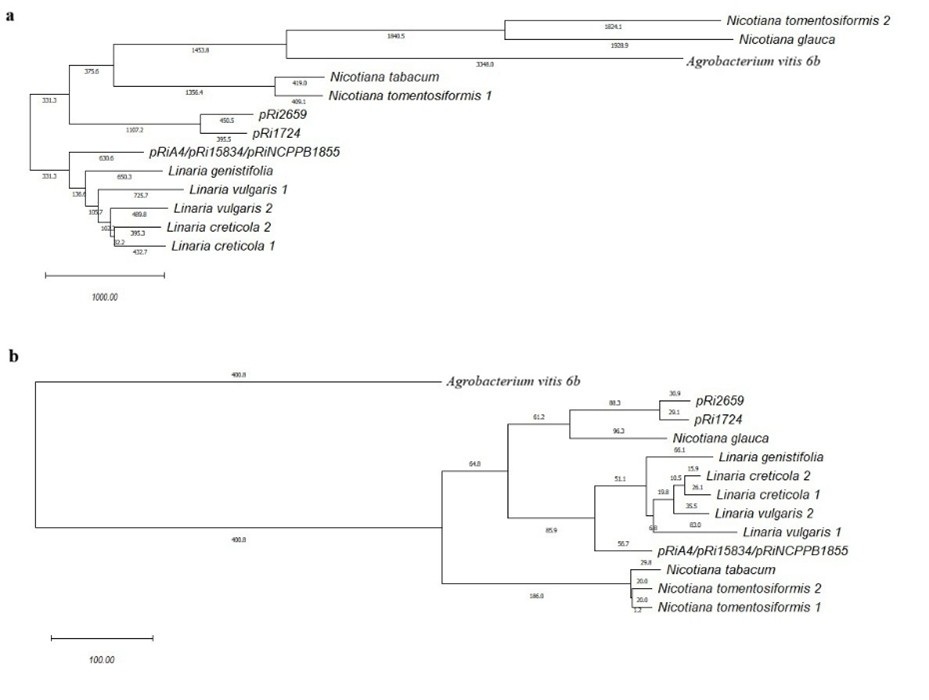


**Fig. S2.** a – phylogenetic trees of nucleotide sequences. b – phylogenetic trees of amino acid sequences of RolC-like proteins and the 6b protein of *A. vitis.*
